# Supplementary material for: Waiting time and mortality rate on lung transplant candidates in Japan: a single-center retrospective cohort study
Source: BMC Pulm Med. 2021 Nov 29;21:390. doi: 10.1186/s12890-021-01760-8 (PMC8630869; doi:10.1186/s12890-021-01760-8)
Supplement: Supplementary file 1 — Additional file 1. List of pulmonary disease in transplant candidates in the study. [file 12890_2021_1760_MOESM1_ESM.docx]

**Supplemental data**

Waiting time and mortality rate on lung transplant candidates in Japan: a single-center retrospective cohort study

Takashi Hirama1,2,¶, Miki Akiba2, Tatsuaki Watanabe1, Yui Watanabe1, Hirotsugu Notsuda1, Hisashi Oishi1,

Hiromichi Niikawa1, Yoshinori Okada1,2

1. Department of Thoracic Surgery, Institute of Development, Aging and Cancer, Tohoku University, Sendai, Miyagi, Japan
2. Division of Organ Transplantation, Tohoku University Hospital, Sendai, Miyagi, Japan

¶ corresponding author

**Supplemental data.** List of pulmonary disease in transplant candidates in the study

| **Obstructive (n=61)**   - Lymphangioleiomyomatosis, 37 - Chronic obstructive pulmonary disease, 17 - Bronchiolitis obliterans, 4 - Other obstructive, 3 |
| --- |

| **Vascular (n=53)**   - Primary pulmonary hypertension/ pulmonary arterial hypertension, 37 - Secondary pulmonary hypertension/ Eisenmenger’s syndrome, 14 - Connective tissue disease-associated-pulmonary hypertension, 2 |
| --- |

| **Suppurative (n=21)**   - Bronchiectasis, 21 (including diffuse panbronchiolitis, 8) |
| --- |

| **Fibrosis (n=114)**   - Idiopathic pulmonary fibrosis, 57 - Connective tissue disease-associated interstitial lung disease, 29 - Drug-induced interstitial lung disease, 6 - Pleuroparenchymal fibroelastosis, 5 - Hypersensitivity pneumonitis, 4 - Nonspecific interstitial pneumonia, 2 - Other fibrosis, 11 |
| --- |

| **Allogeneic (n=20)**   - Graft-versus-host disease post hematopoietic stem cell transplant, 13 - Chronic lung allograft dysfunction, 7 |
| --- |
